# Supplementary material for: Joint infrastructure and biodiversity optimisation reveals favourable cost-protection trade-offs in a carefully planned renewable energy transition
Source: Research Square preprint supplement (doi:10.21203/rs.3.rs-7014207/v1), 2025-07-10
Supplement: Supplementary file 1 [file 13f878b41a7c802b0e2edc09.pdf]

## Supplementary data – figures and tables

**Supplementary Figure 1.** Inputs into prioritization. A) The count of known and likely-to-occur threatened species distributions. B) The extent of threatened ecological communities. C) Business-as-usual (BAU) priority protected area data including, CAPAD, RAMSAR, World Heritage Areas, and high-value habitats for threatened birds and mammals. D) The performance of the zonation curves, with the dark line representing the mean coverage of all species distributions at each priority rank, and the grey lines showing the individual species/TECs coverage at each priority rank used as VRE siting constraints.

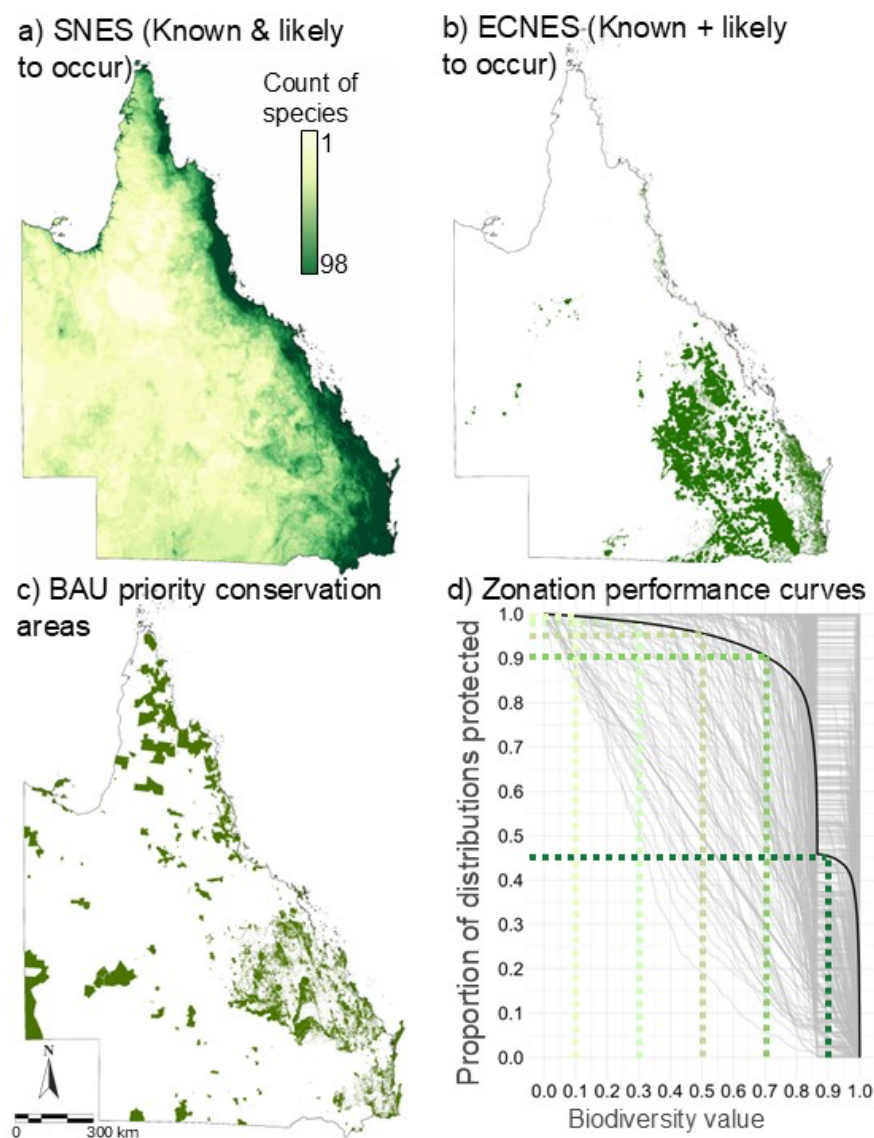

**Supplementary Figure 2. Species from SNES dataset whose distributions occur entirely outside areas covered by our business as usual scenario.** Blue dots are buffered points centered on the species distributions and the green areas are areas covered by the CAPAD database, RAMSAR wetlands, World Heritage Areas, and high-value habitat.

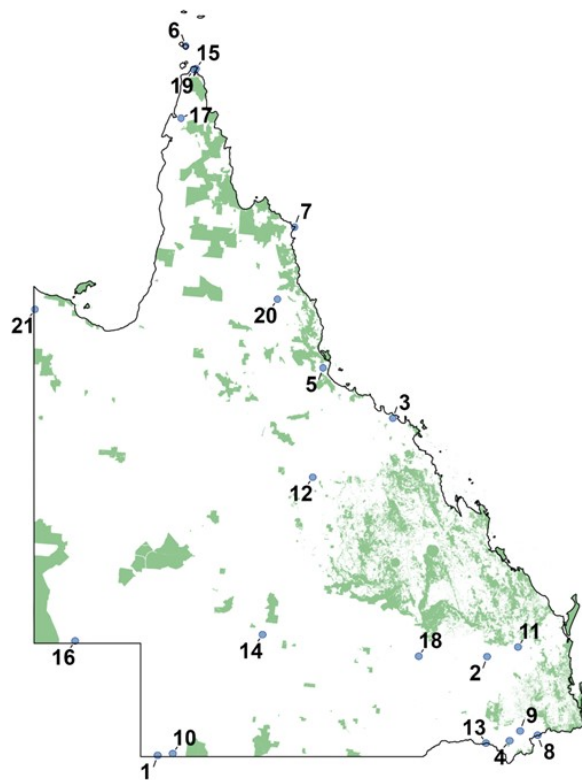

| Number | Species Name                    | Threat status (2019)  |
|--------|---------------------------------|-----------------------|
| 1      | <i>Acacia cameorum</i>          | Vulnerable            |
| 2      | <i>Acacia handonis</i>          | Vulnerable            |
| 3      | <i>Aristida granitica</i>       | Endangered            |
| 4      | <i>Astrotricha roddii</i>       | Endangered            |
| 5      | <i>Cyperus cephalotes</i>       | Endangered            |
| 6      | <i>Dischidia litoralis</i>      | Vulnerable            |
| 7      | <i>Eremochloa muricata</i>      | Endangered            |
| 8      | <i>Eucalyptus glaucina</i>      | Vulnerable            |
| 9      | <i>Eucalyptus infera</i>        | Vulnerable            |
| 10     | <i>Grevillea kennedyana</i>     | Vulnerable            |
| 11     | <i>Lasiopetalum</i> sp. Proston | Critically Endangered |
| 12     | <i>Lawrenzia buchananensis</i>  | Vulnerable            |
| 13     | <i>Lepidium monoplacoides</i>   | Endangered            |
| 14     | <i>Melaleuca kunzeoides</i>     | Vulnerable            |
| 15     | <i>Myriophyllum coronatum</i>   | Vulnerable            |
| 16     | <i>Pseudomys australis</i>      | Vulnerable            |
| 17     | <i>Solanum dunalianum</i>       | Vulnerable            |
| 18     | <i>Swainsona murrayana</i>      | Vulnerable            |
| 19     | <i>Syzygium velarum</i>         | Vulnerable            |
| 20     | <i>Zieria rimulosa</i>          | Vulnerable            |
| 21     | <i>Zyzomys palatalis</i>        | Endangered            |

**Supplementary Figure 3. The integration of biodiversity (purple) and other constraint data in a renewable energy project and transmission cost-optimisation algorithm.** The variable renewable energy (VRE) siting algorithm considers areas using techno-economic and environmental considerations and breaks them into individual candidate projects. Other techno-economic layers include mapping of high-value irrigated agricultural land (ABARES, 2024), urban area maps (ABARES 2024), active mines (Geoscience Australia, 2020), remote communities (Geoscience Australia, 2016a) (Geoscience Australia, 2016a), defence areas (Department of Defence, 2015), transport infrastructure (Geoscience Australia, 2016b), existing energy infrastructure or in areas with large slopes (Hutchinson et al., 2009), low VRE resources (Geoscience Australia, 2021), mineral reserves (Geoscience Australia, 2016c), or offshore shipping lanes (Authority, 2019) that represent places excluded from energy project or transmission infrastructure siting. These are introduced to the transmission and energy project siting cost optimisation algorithm “Renewable Installation” as constraints. The outputs of the algorithm include renewable energy project siting that (on net) meet energy demands at minimum cost, subject to biodiversity and other constraints for a given biodiversity protection scenario.

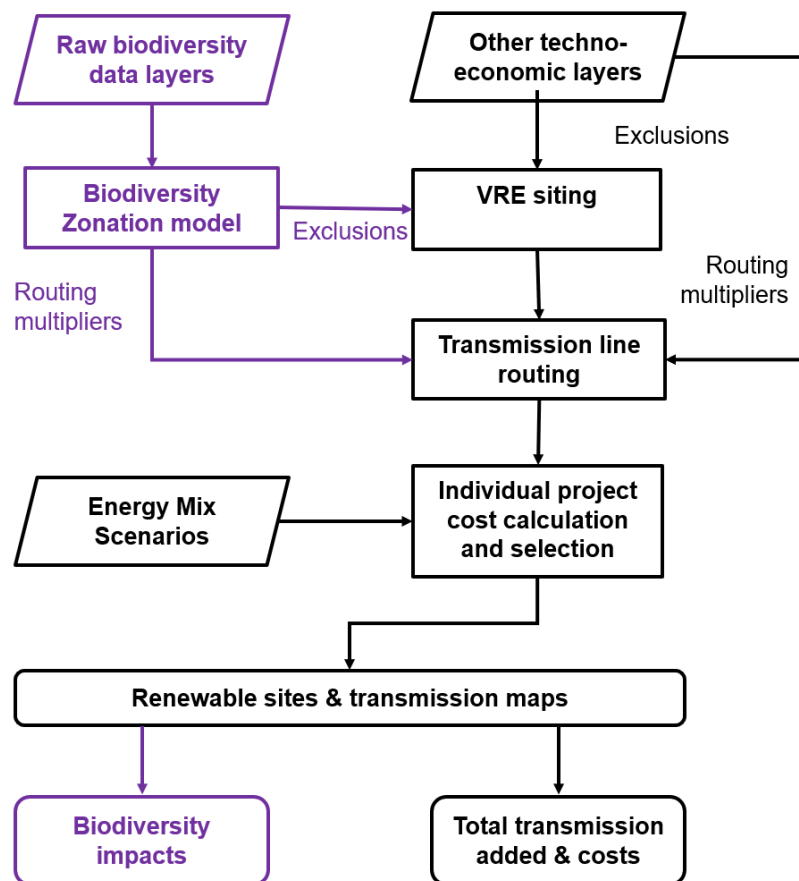

**Supplementary Figure 4.** A map of Queensland, showing ports (\*), cities (·), export nodes(⊗)and the existing transmission network as lines (*Dominic et al., 2023a*).

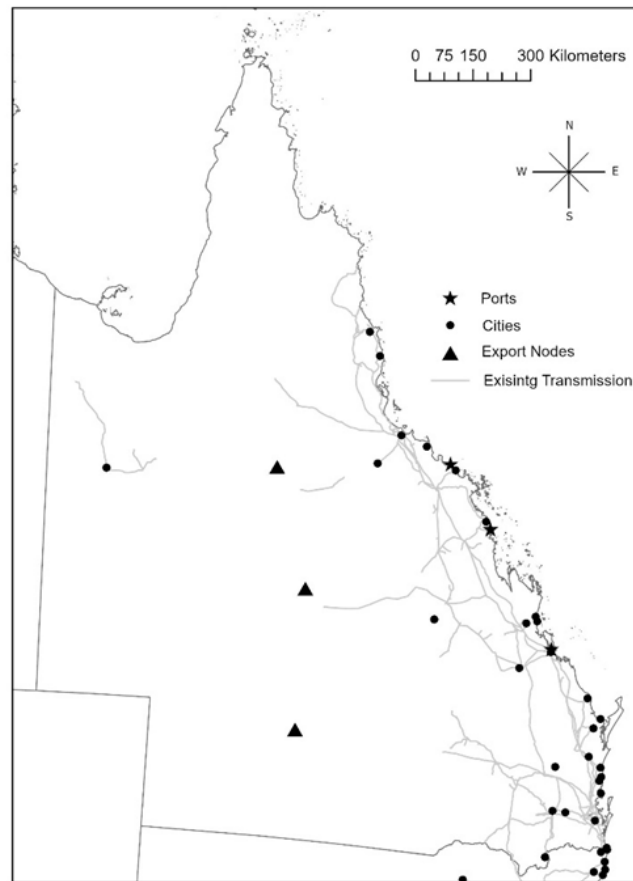

**Supplementary Figure 5.** a) Capital cost projections for renewable energy generation and b) their operating cost (AEMO, 2021a; Graham, *et al.*, 2021; NREL, 2021)

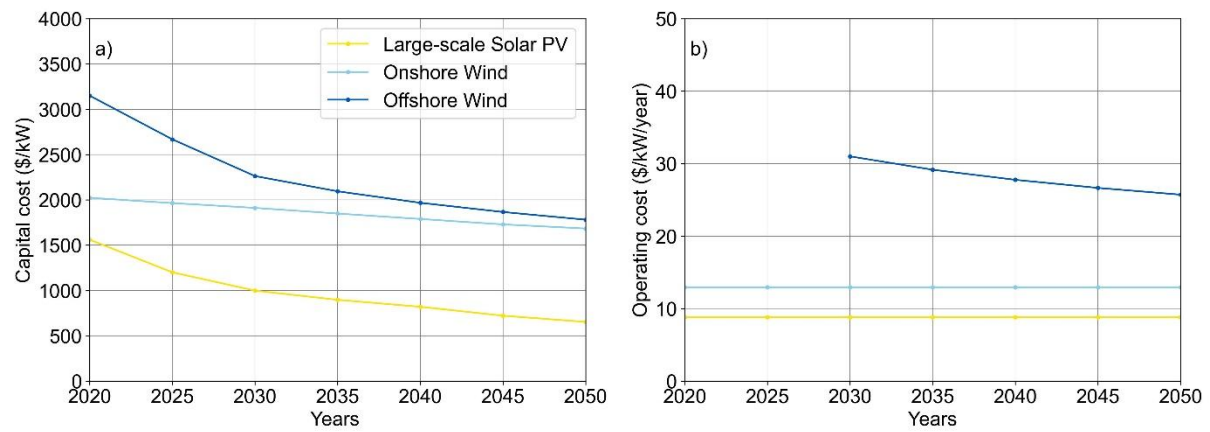

## Supplementary Tables

**Supplementary Table 1.** Areas excluded from VRE siting in addition to high biodiversity value areas.

| Item            | Layer                                                                                                           | source                                                                                                                                                                                                                                                                                                                                                                                                                                                                                                                                                                                                                                                                                                                                                                                      |
|-----------------|-----------------------------------------------------------------------------------------------------------------|---------------------------------------------------------------------------------------------------------------------------------------------------------------------------------------------------------------------------------------------------------------------------------------------------------------------------------------------------------------------------------------------------------------------------------------------------------------------------------------------------------------------------------------------------------------------------------------------------------------------------------------------------------------------------------------------------------------------------------------------------------------------------------------------|
| techno-economic | Active mines                                                                                                    | Geoscience Australia, "Australian Critical Minerals Operating Mines And Deposits (MapServer)," Commonwealth of Australia (Geoscience Australia), 2020. Accessed: Jun. 15, 2021. [Online]. Available: <a href="https://services.ga.gov.au/gis/rest/services/AustralianCriticalMineralsOperatingMinesAndDeposits/MapServer">https://services.ga.gov.au/gis/rest/services/AustralianCriticalMineralsOperatingMinesAndDeposits/MapServer</a>                                                                                                                                                                                                                                                                                                                                                    |
| techno-economic | Built up areas                                                                                                  | Geoscience Australia, "AREMI_Buildings_WM (MapServer)," Commonwealth of Australia (Geoscience Australia), 2016. Accessed: Jun. 15, 2021. <a href="https://services.ga.gov.au/gis/rest/services/AREMI_Buildings_WM/MapServer">https://services.ga.gov.au/gis/rest/services/AREMI_Buildings_WM/MapServer</a>                                                                                                                                                                                                                                                                                                                                                                                                                                                                                  |
| techno-economic | Defence restricted - practice, training, prohibited                                                             | Department of Defence, "Defence_Restricted_Areas (MapServer)," Commonwealth of Australia (Department 2015. Accessed: Jun. 15, 2021. [Online]. Available: <a href="https://services.ga.gov.au/gis/rest/services/Defence_Restricted_Areas/MapServer">es.ga.gov.au/gis/rest/services/Defence_Restricted_Areas/MapServer</a>                                                                                                                                                                                                                                                                                                                                                                                                                                                                    |
| techno-economic | Transport infrastructure - roads (no buffer), airports, landing grounds, heliports, runways                     | Geoscience Australia, "NM_Transport_Infrastructure (MapServer)," Commonwealth of Australia (Geoscience Australia), 2016. Accessed: Jun. 15, 2021. [Online]. Available: <a href="https://services.ga.gov.au/gis/rest/services/NM_Transport_Infrastructure/MapServer">https://services.ga.gov.au/gis/rest/services/NM_Transport_Infrastructure/MapServer</a>                                                                                                                                                                                                                                                                                                                                                                                                                                  |
| techno-economic | Irrigated farmland, sugar, pasture, rainfed farmland                                                            | L. Lyburner, P. Tan, A. McIntyre, M. Thankappan, and J. Sixsmith, "Dynamic Land Cover Dataset Version 2.1," Geoscience Australia, Canberra, 2017. Accessed: Jun. 21, 2021. [Online]. Available: <a href="http://pid.geoscience.gov.au/dataset/ga/83868">http://pid.geoscience.gov.au/dataset/ga/83868</a>                                                                                                                                                                                                                                                                                                                                                                                                                                                                                   |
| techno-economic | Slope                                                                                                           | M. F. Hutchinson, J. L. Stein, J. A. Stein, H. Anderson, and P. K. Tickle, "GEODATA 9 second, DEM and D8, Digital Elevation Model Version 3 and Flow Direction Grid 2008," Geoscience Australia, Canberra, 2009. Accessed: Jul. 12, 2021. [Online]. Available: <a href="http://pid.geoscience.gov.au/dataset/ga/66006">http://pid.geoscience.gov.au/dataset/ga/66006</a>                                                                                                                                                                                                                                                                                                                                                                                                                    |
| techno-economic | Capacity factor                                                                                                 | Geoscience Australia, "Renewable Energy Capacity Factor Maps (2021)," Geoscience Australia, Canberra, 2021. Accessed: May 17, 2021. [Online]. Available: <a href="http://pid.geoscience.gov.au/dataset/ga/145109">http://pid.geoscience.gov.au/dataset/ga/145109</a>                                                                                                                                                                                                                                                                                                                                                                                                                                                                                                                        |
| techno-economic | Offshore shipping lanes                                                                                         | 1) National Geospatial- Intelligence Agency, "Pub. 175, Sailing Directions (Enroute) North, West, and South Coasts of Australia, Thirteenth Edition." US Department of Defense, 2017. Accessed: Dec. 18, 2021. Available: <a href="https://msi.nga.mil/api/publications/download?key=16694491/SFH00000/Pub175bk.pdf&amp;type=view">https://msi.nga.mil/api/publications/download?key=16694491/SFH00000/Pub175bk.pdf&amp;type=view</a> .<br>2) Darwin Port, "Darwin Port," 2021. Accessed Dec. 18, 2021. <a href="https://www.darwinport.com.au/">https://www.darwinport.com.au/</a><br>3) Flinders Port Holdings, "Flinders Port Holdings," Flinders Port Holdings. Accessed Dec. 18, 2021. <a href="https://www.flindersportholdings.com.au/">https://www.flindersportholdings.com.au/</a> |
| environmental   | Reserves - forestry, indigenous, water supply, nature conservation land, nature conservation marine, prohibited | Geoscience Australia, "NM_Reserves (MapServer)," Commonwealth of Australia (Geoscience Australia), 2016. Accessed: Jun. 15, 2021. [Online]. Available: <a href="https://services.ga.gov.au/gis/rest/services/NM_Reserves/MapServer">https://services.ga.gov.au/gis/rest/services/NM_Reserves/MapServer</a>                                                                                                                                                                                                                                                                                                                                                                                                                                                                                  |
| environmental   | Inland water bodies [15], salt lakes, wetlands                                                                  | Krause et al, "DEA Waterbodies," Geoscience Australia, Jan. 21, 2020. Accessed: Jun. 21, 2021. [Online]. Available: <a href="https://www.ga.gov.au/dea/products/dea-waterbodies">https://www.ga.gov.au/dea/products/dea-waterbodies</a>                                                                                                                                                                                                                                                                                                                                                                                                                                                                                                                                                     |

**Supplementary Table 2.** Length of new transmission beyond the existing transmission network. The existing transmission lines ( $\geq 110$ kv) cover 19741.3 km. New transmission is the additional modelled transmission length needed for each threshold. The 'Total length' is the model length plus the existing length. The 'Percent increase' is the model 'Length' divided by the existing length times 100.

| Scenario | biodiversity protection level | New transmission (km) | Total length (km) | Percent increase |
|----------|-------------------------------|-----------------------|-------------------|------------------|
| tx1      | BAU                           | 20423.21              | 40164.5           | 103.45           |
|          | > 70                          | 21702.44              | 41443.73          | 109.93           |
|          | > 50                          | 23545.36              | 43286.65          | 119.26           |
|          | > 30                          | 28090.51              | 47831.81          | 142.29           |
|          | > 10                          | 45211.28              | 64952.57          | 229.02           |
| tx2      | BAU                           | 20292.94              | 40034.24          | 102.79           |
|          | > 70                          | 21754.03              | 41495.33          | 110.19           |
|          | > 50                          | 23033.33              | 42774.62          | 116.67           |
|          | > 30                          | 27902.43              | 47643.73          | 141.34           |
|          | > 10                          | 45250.52              | 64991.82          | 229.21           |

**Supplementary Table 3.** Percent increase in area of existing transmission easements based on each transmission scenario, for the year 2050. The total area increase is the change in square kilometres required to upgrade the existing easements to the easements required by 500 kv lines. The percent increase is the upgraded easement area divided by the total existing transmission total existing easements.

| Scenario | Threshold | Area increase (km2) | Percent increase |
|----------|-----------|---------------------|------------------|
| tx1      | BAU       | 87.21               | 13.14            |
|          | > 70      | 101.78              | 15.33            |
|          | > 50      | 96.89               | 14.60            |
|          | > 30      | 90.45               | 13.63            |
|          | > 10      | 84.71               | 12.76            |
| tx2      | BAU       | 60.39               | 9.10             |
|          | > 70      | 85.11               | 12.82            |
|          | > 50      | 69.05               | 10.41            |
|          | > 30      | 62.93               | 9.48             |
|          | > 10      | 88.42               | 13.32            |



**Supplementary Table 4.** The extent of existing transmission easement within each biodiversity value threshold category.

| Zonation value | Area of existing transmission easement (km2) | Percent of total |
|----------------|----------------------------------------------|------------------|
| 0 -.1          | 0.18                                         | 0.027127         |
| 0.1 - 0.3      | 6.17                                         | 0.929847         |
| 0.3 - 0.5      | 44.2                                         | 6.661141         |
| 0.5 - 0.7      | 161.2                                        | 24.29357         |
| 0.7 - 0.9      | 354.42                                       | 53.4127          |
| 0.9 - 1.0      | 97.38                                        | 14.67561         |
| Grand Total    | 663.55                                       | 100              |

**Supplementary Table 5.** Summary of project size, project area, power density and land utilisation rate of VRE projects (Davis, *Dominic et al.*, 2023a; Larson *et al.*, 2021; Offshore Wind Industry Panel Discussion, 2021).

|                       | Unit               | Solar PV | Onshore Wind | Offshore Wind |
|-----------------------|--------------------|----------|--------------|---------------|
| Maximum project size  | MW                 | 900      | 1080         | 2200          |
| Minimum project size  | MW                 | 20       | 50           | 100           |
| Maximum project area  | km <sup>2</sup>    | 100      | 400          | 500           |
| Maximum project area  | km <sup>2</sup>    | 2        | 19           | 23            |
| Power density         | MW/km <sup>2</sup> | 45       | 2.7          | 4.4           |
| Land utilisation rate | %                  | 20       | 100          | 100           |

**Supplementary Table 6.** Included and excluded transmission infrastructure in modelling each transmission category.

| Infrastructure component                                                            | Inter-regional transmission | VRE to domestic load | VRE to export node |
|-------------------------------------------------------------------------------------|-----------------------------|----------------------|--------------------|
| TX line to the existing transmission grid                                           | NO                          | YES                  | NO                 |
| Sending converter/substation (terminal)                                             | YES                         | YES                  | YES                |
| New substations at connection to existing transmission grid (intermediary endpoint) | NO                          | YES                  | NO                 |
| TX line to the final destination                                                    | YES                         | YES                  | YES                |
| New substation at destination (endpoint)                                            | YES                         | YES                  | NO                 |
| New substation(s) to maintain power quality over longer TX lines                    | YES                         | YES                  | YES                |

**Supplementary Table 7.** Representative transmission types and costs used in the modelling. For each type we included the carrying capacity, maximum rated distance (km), cost per km of line (million 2021AU\$), and per substation costs (million 2021AU\$).

| Voltage (kV) | Circuits | Type | Carrying capacity (MW) (Note 1) | Max Rated distance km (Note 2) | Cost mAU\$2021 / km [25] | New substation cost m2021AU\$ (cost at sending end of spur line) (Note 3) |
|--------------|----------|------|---------------------------------|--------------------------------|--------------------------|---------------------------------------------------------------------------|
| 132          | double   | HVAC | 250                             | 250                            | 1.128                    | 28 (21)                                                                   |
| 275          | single   | HVAC | 400                             | 250                            | 1.270                    | 36 (23)                                                                   |
| 275          | double   | HVAC | 950                             | 250                            | 1.563                    | 53 (27)                                                                   |
| 330          | single   | HVAC | 600                             | 250                            | 1.469                    | 41 (23)                                                                   |
| 330          | double   | HVAC | 1200                            | 250                            | 1.794                    | 62 (27)                                                                   |
| 500          | double   | HVAC | 3040                            | 250                            | 2.542                    | 70 (35)                                                                   |
| 500          | twin     | HVDC | 3000                            | 1000                           | 2.016                    | 633 (597)                                                                 |
| 500          | single   | HVDC | 385                             | 300                            | 1.077                    | 185 (167)                                                                 |
| 500          | twin     | HVDC | 750                             | 300                            | 1.923                    | 330 (295)                                                                 |
| 500          | twin     | HVDC | 1500                            | 300                            | 3.158                    | 633 (597)                                                                 |

1. Assumed to be half of MVA rating.

2. Maximum rated distance of line without adding a repeater substation to maintain power quality.

3. Costs for the sending substation on spur lines (in parentheses) are the same as the cost of the new substation minus transformers in AEMO's VRE project costs [25].

**Supplementary Table 8.** Costs of recent transmission projects and AEMO transmission database. The cost of transmission in Australia have increased significantly in recent years. This is a result of several factors: the increase in fuel costs, material costs and construction costs due to supply chain disruptions (Transgrid, 2024). Moreover, the transfer capacity of actual transmission projects can be much lower than estimated in this work due to regulation and safety. The following table summarises a comparison between recently reported transmission costs and cost estimates that use the AEMO transmission cost database that is a reference for this study (AEMO, 2021c). Overall, recent transmission cost estimates are more than double the estimates using the AEMO transmission cost database.

| Projects                                     | Reported Transmission Costs |                             | AEMO Estimated Transmission Costs<br>(AEMO, 2021c) |
|----------------------------------------------|-----------------------------|-----------------------------|----------------------------------------------------|
|                                              | Year                        | Capital Cost<br>(m\$/GW.km) | Capital Cost<br>(m\$/GW.km)                        |
| <b>HumeLink Project</b><br>(Transgrid, 2024) | 2024                        | 5.4 m\$/GW.km               | 1 m\$/GW.km                                        |
| <b>VNI West Project (AEMO, 2023)</b>         | 2023                        | 4.7 m\$/GW.km               | 1 m\$/GW.km                                        |
| <b>EnergyConnect (AER, 2021)</b>             | 2021                        | 3.3 m\$/GW.km               | 1.7 m\$/GW.km                                      |

**Supplementary Table 9.** The 524 species and their associated threat status. These species' distributions were used in the prioritization analysis to identify High Biodiversity Value Areas. Species are a subset of the national SNES dataset, that are known or likely to occur within the state of Queensland. The 22 ecological communities and their threat status. These communities' distributions were used in the prioritization analysis to identify High Biodiversity Value Areas. These are the communities that are known or likely to occur within the state of Queensland, and are a subset of the national ECNES dataset.

[Supplementary Table\\_The 524 species and their associated threat status.xls](#)

[Supplementary Table\\_The 22 ecological communities and their threat status.xlsx](#)

**Supplementary Table 10.** Estimated demand is the Gigawatts needed to meet domestic demand in 2050 based on the Net Zero Australia state targets for the Eplus scenario. The area available is the area, in square kilometers, that occur within each state but are not covered by Net Zero BAU exclusion layers. The total footprint is the estimated total footprint of the generation estimated using the equation total footprint for solar = (MW/45MW/km), for wind total footprint = (mw/2.7MW/km). The total and direct footprints are in square kilometers. The direct footprints are 90% of the total footprint for solar and 1% of the total footprint for wind. The percent of the available land for Total footprint and direct footprint are included in parenthesis after each area estimate.

| State              | Large scale solar target (GW) | Onshore wind target (GW) | Area (km) available for solar | Area (km) available for wind | Solar total footprint (% of available area) | Onshore Wind total footprint (% of avail. area) | Solar direct footprint (% of avail. area) | Onshore Wind direct footprint (% of avail. area) |
|--------------------|-------------------------------|--------------------------|-------------------------------|------------------------------|---------------------------------------------|-------------------------------------------------|-------------------------------------------|--------------------------------------------------|
| New South Wales    | 44.14                         | 33.8                     | 474431                        | 508003                       | 981 (0.2%)                                  | 12519 (2.5%)                                    | 893 (0.2%)                                | 125 (<0.01%)                                     |
| Northern Territory | 19.39                         | 2.23                     | 799800                        | 742580                       | 431 (0.1%)                                  | 826 (0.1%)                                      | 392 (0.05%)                               | 8 (<0.01%)                                       |
| Queensland         | 49.04                         | 18.69                    | 1244394                       | 1179494                      | 1090 (0.1%)                                 | 6922 (0.6%)                                     | 992 (0.08%)                               | 69 (<0.01%)                                      |
| South Australia    | 15.03                         | 3.07                     | 313639                        | 337757                       | 334 (0.1%)                                  | 1137 (0.3%)                                     | 304 (0.1%)                                | 11 (<0.01%)                                      |
| Tasmania           | 1.16                          | 0.11                     | 8405                          | 7741                         | 26 (0.3%)                                   | 41 (0.5%)                                       | 23 (0.3%)                                 | 0.2 (<0.01%)                                     |
| Victoria           | 11.14                         | 22.96                    | 54562                         | 74629                        | 248 (0.5%)                                  | 8504 (11.4%)                                    | 225 (0.4%)                                | 85 (<0.01%)                                      |
| Western Australia  | 49.53                         | 15.28                    | 1097953                       | 1161953                      | 1101 (0.1%)                                 | 5659 (0.5%)                                     | 1002 (0.1%)                               | 57 (<0.01%)                                      |

## **Supplementary data – upload eplus.gdb with all of the data layers.**

Supporting data: eplus.gdb with all of the data

**Table 11.** Additional exclusions used in VRE and transmission citing. The analysis incorporated energy asset siting exclusions such as irrigated lands (prohibiting all new variable renewable energy infrastructure), rainfed cropland (prohibiting new solar PV), critical habitat of threatened species and ecological communities, national reserves, areas within the Collaborative Australian Protected Area Database, and inland water bodies, salt lakes, and wetlands. Unless specifically protected in a base exclusion dataset, all Indigenous Estate categories were considered for energy infrastructure siting. Furthermore, the analysis prioritized the utilization of existing transmission corridors over the development of new greenfield corridors



**Supplementary table 12.** Estimated total electricity costs relative to BAU. Industrial \$/MWh = wholesale market \$/MWh + TX cost \$/MWh. Residential \$/MWh = wholesale market \$/MWh + TX cost \$/MWh + DN cost \$/MWh. Modest cost increases for both industrial and residential customers with up to 50% of most valuable biodiversity protected.

|                                   | x1 TX costs |        |        |        |        |  | x2 TX costs |        |        |        |        |
|-----------------------------------|-------------|--------|--------|--------|--------|--|-------------|--------|--------|--------|--------|
|                                   | BAU         | Top 30 | Top 50 | Top 70 | Top 90 |  | BAU         | Top 30 | Top 50 | Top 70 | Top 90 |
| <b>Wholesale market \$/MWh</b>    | 174         | 174    | 174    | 174    | 176    |  | 174         | 174    | 174    | 175    | 176    |
| <b>TX cost \$/MWh</b>             | 44          | 47     | 49     | 53     | 62     |  | 59          | 64     | 69     | 78     | 96     |
| <b>DN cost \$/MWh</b>             | 131         | 131    | 131    | 131    | 131    |  | 131         | 131    | 131    | 131    | 131    |
|                                   |             |        |        |        |        |  |             |        |        |        |        |
| <b>Industrial \$/MWh</b>          | 218         | 221    | 223    | 228    | 239    |  | 233         | 238    | 243    | 252    | 272    |
| <b>Increase vs BAU %</b>          |             | 1%     | 2%     | 5%     | 10%    |  |             | 2%     | 4%     | 8%     | 17%    |
|                                   |             |        |        |        |        |  |             |        |        |        |        |
| <b>Residential \$/MWh</b>         | 349         | 352    | 355    | 359    | 370    |  | 364         | 370    | 375    | 384    | 403    |
| <b>Increase vs BAU %</b>          |             | 1%     | 2%     | 3%     | 6%     |  |             | 2%     | 3%     | 5%     | 11%    |
|                                   |             |        |        |        |        |  |             |        |        |        |        |
| <b>Renewable Availability TWh</b> | 215         | 211    | 205    | 206    | 216    |  | 225         | 221    | 212    | 215    | 225    |
| <b>Demand Twh</b>                 | 101         | 101    | 101    | 101    | 101    |  | 101         | 101    | 101    | 101    | 101    |
